# Supplementary material for: Water absorption through salivary gland type I acini in the blacklegged tick, Ixodes scapularis
Source: PeerJ. 2017 Oct 31;5:e3984. doi: 10.7717/peerj.3984 (PMC5669254; doi:10.7717/peerj.3984)
Supplement: Supplemental Information 1 [file peerj-05-3984-s004.xlsx]

## Sheet: Figure2
	µL Consumed / 30 min
	Fluorescence	No Fluorescence
	0.06	0.08
	0.14	0.12
	0.172	0.092
	0.112	0.124
	0.108	0.088
	0.228	0.104
	0.16	0.08
	0.204	0.052
	0.344	0.148
	0.36
	0.272
	0.4
	0.24
	0.448
	0.132
	0.38

## Sheet: Figure3
	µL Consumed / 30 min
	Hank's	Ouabain
	0.4	0.088
	0.24	0.104
	0.448	0.08
	0.132	0.052
	0.38	0.148

## Sheet: Figure5A
	µL Consumed / 30 min
	Hanks	Ouabain (100µM)
	0.38	0.352
	0.196	0.144
	0.344	0.236
	0.408	0.232
	0.18	0.12
	0.376	0.104
	0.316	0.164
	0.176	0.14
	0.192	0.108
	0.236	0.168
	0.164	0.22

## Sheet: Figure5B
			Confocal (fluorescence)
	Pre-Ingestion source	Rh123 ingested volume (uL)	SG (O: signal, X: No signal)
1	Hanks	0.38	O/O		Chi-Test		Hank	Ouabain
2	Hanks	0.196	O/O			signal	19	10	29
3	Hanks	0.344	O/O			no-signal	3	12	15
4	Hanks	0.408	O/O				22	22	44
5	Hanks	0.18	O/X
6	Hanks	0.376	O/O				Hank	Ouabain
7	Hanks	0.316	O/O			signal	14.5	14.5	29
8	Hanks	0.176	O/O			no-signal	7.5	7.5	15
9	Hanks	0.192	O/X				22	22	44
10	Hanks	0.236	O/O
11	Hanks	0.164	X/O			p-value	0.00420499
		% SG w/ Rh123 type-I acini	0.863636
1	Ouabain (100µM)	0.352	O/O
2	Ouabain (100µM)	0.144	X/X
3	Ouabain (100µM)	0.236	X/X
4	Ouabain (100µM)	0.232	O/O
5	Ouabain (100µM)	0.12	X/X
6	Ouabain (100µM)	0.104	X/X
7	Ouabain (100µM)	0.164	O/X
8	Ouabain (100µM)	0.14	O/O
9	Ouabain (100µM)	0.108	O/O
10	Ouabain (100µM)	0.168	O/X
11	Ouabain (100µM)	0.22	X/X
		% SG w/ Rh123 type-I acini	0.454545

## Sheet: Figure6
		Attracted & Stayed	Drink water	total ticks
	Rep1	1	2	9
	Rep2	1	0	8
	Rep3	3	0	8
	Rep4	2	0	8
	Rep5	3	0	10
		10	2	43
		Percentage of each group
		Attracted & Stayed	Drink water	No attraction
		0.232558	0.0465116	0.72093
